# Supplementary material for: Thrombin Determination Using Graphene Oxide Sensors with Co-Assisted Amplification
Source: MDPI journal article supplement (doi:10.3390/mi13091435), 2022-08-31
Supplement: s1 [file s1]

# Thrombin Determination Using Graphene Oxide Sensors with Co-assisted Amplification

Lei Liu<sup>a</sup>, Qin Li<sup>b</sup>, Haixia Shi<sup>c\*</sup>, Li Gao<sup>b\*</sup>

<sup>a</sup>Department of Kidney Transplantation, The Second Xiangya Hospital of Central South University, Changsha, 410011, P.R.China

<sup>b</sup> School of Life Sciences, Jiangsu University, Zhenjiang 212013, P. R. China;

<sup>c</sup>P.E.department of Jiangsu University, Zhenjiang 212013, P. R. China

Correspondence: gaoli@ujs.edu.cn

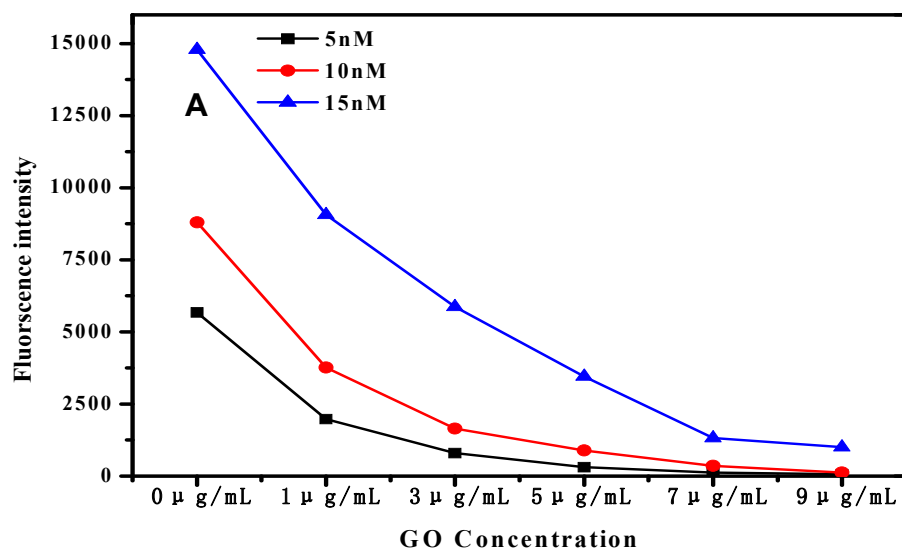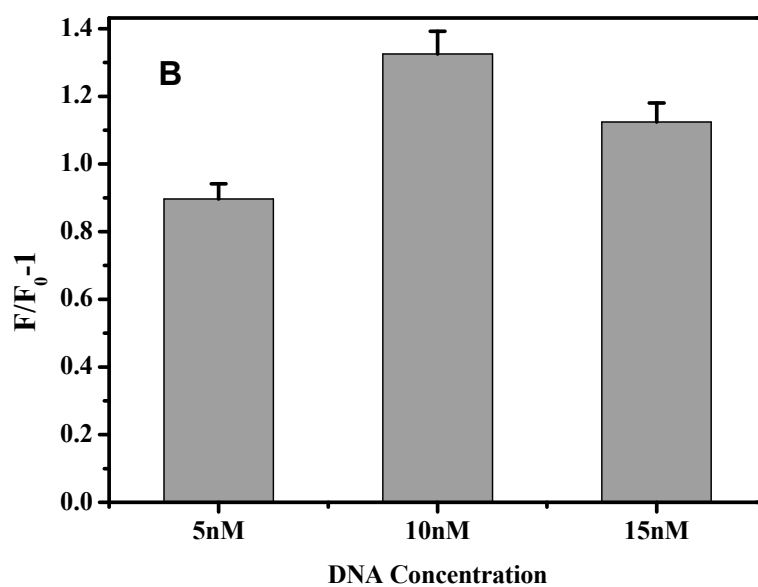

**Figure S1.** (A) The fluorescence intensity of different concentrations of FAM-DNA in the addition of various concentrations of GO. (B) Effect of different concentrations of DNA for thrombin detection.

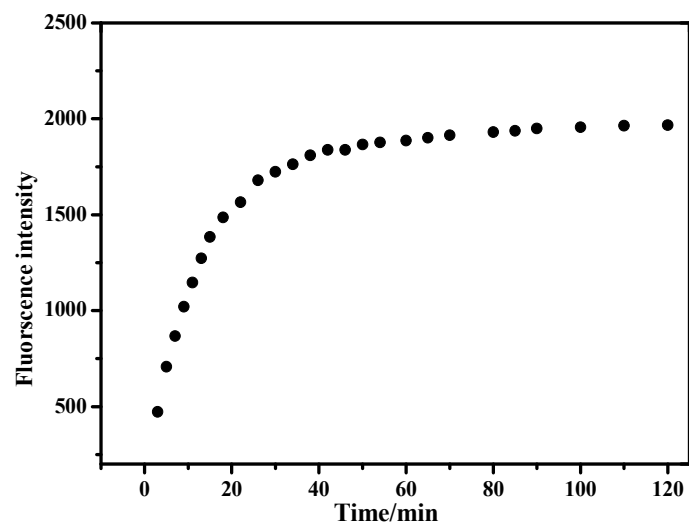

**Figure S2.** The fluorescence intensity of GO-DNA sensor by covalent linking with the change of time after added thrombin (1 nM)

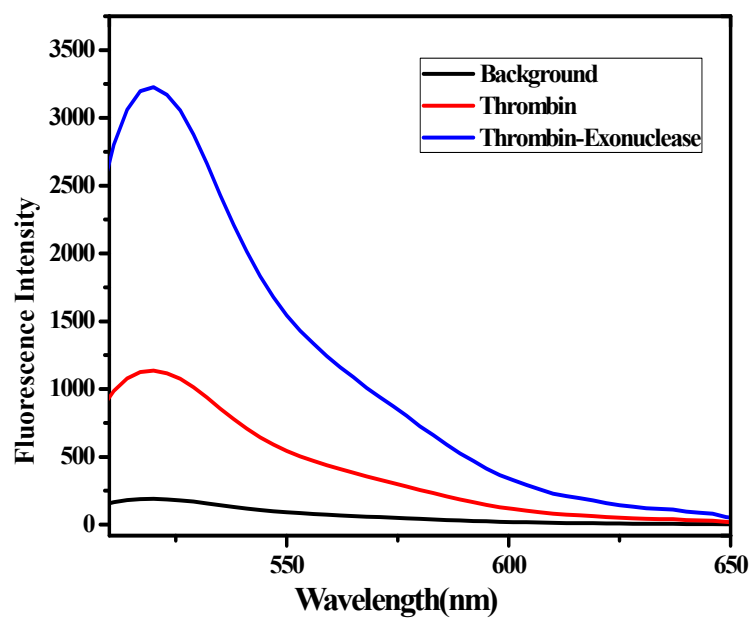

**Figure S3.** The fluorescence intensity of TBA in blank (black), with thrombin (red), and with 0.03U/μL exonuclease (blue).

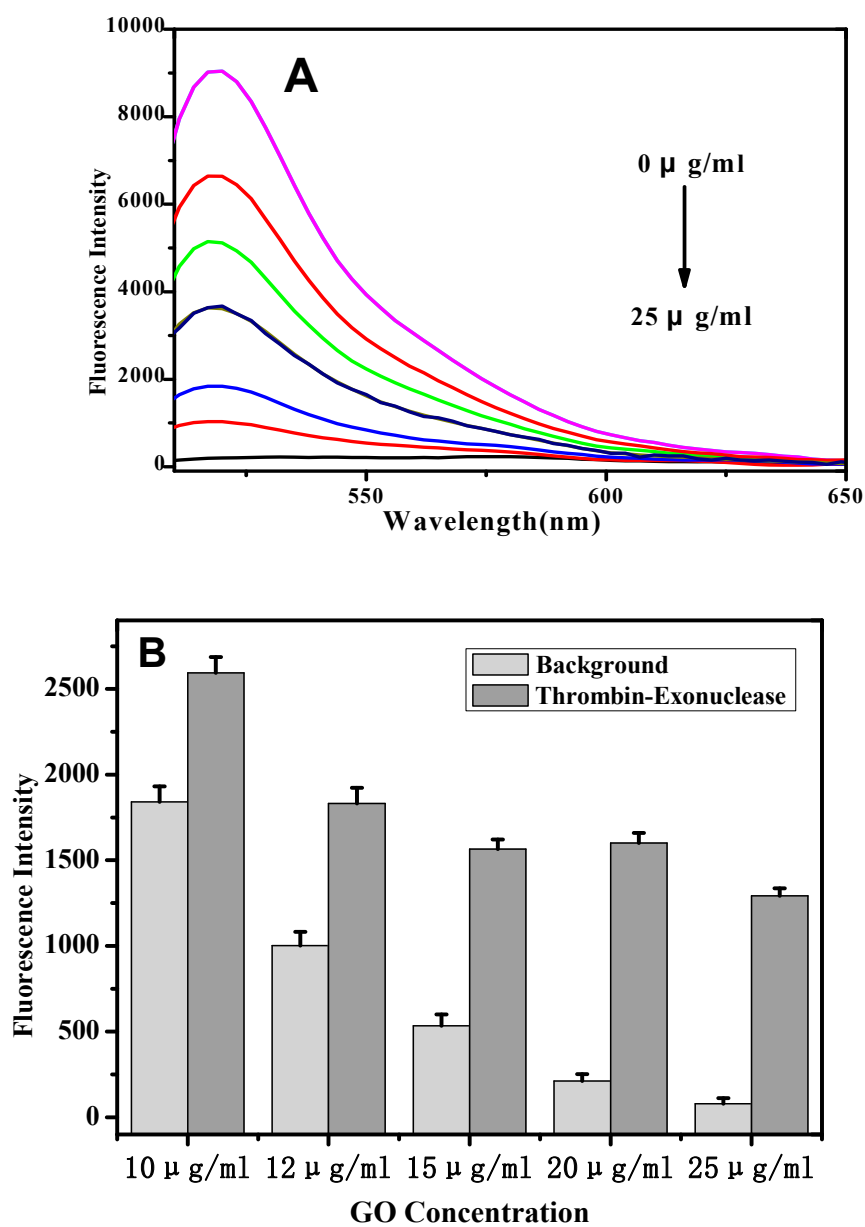

**Figure S4.** (A) The fluorescence intensity of TBA in the presence of various concentrations of GO (2, 6, 10, 12, 15, 20, 25  $\mu\text{g/mL}$ ); (B) The Influence of GO concentration for the detection of thrombin.

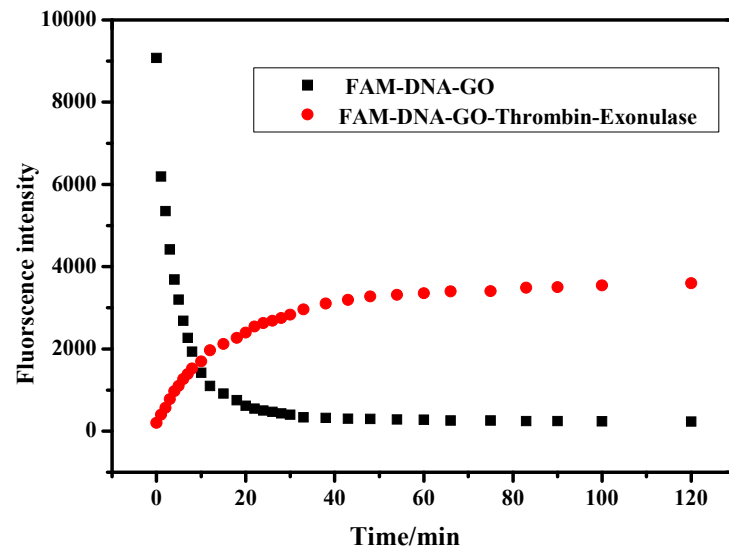

**Figure S5.** The fluorescence intensity of TBA changing with time (Black:10 nM DNA-20  $\mu\text{g/ml}$  GO, Red: 10 nM DNA-20  $\mu\text{g/ml}$  GO- (1nM) Thrombin-Exonulase (0.03 U/ $\mu\text{L}$ ))

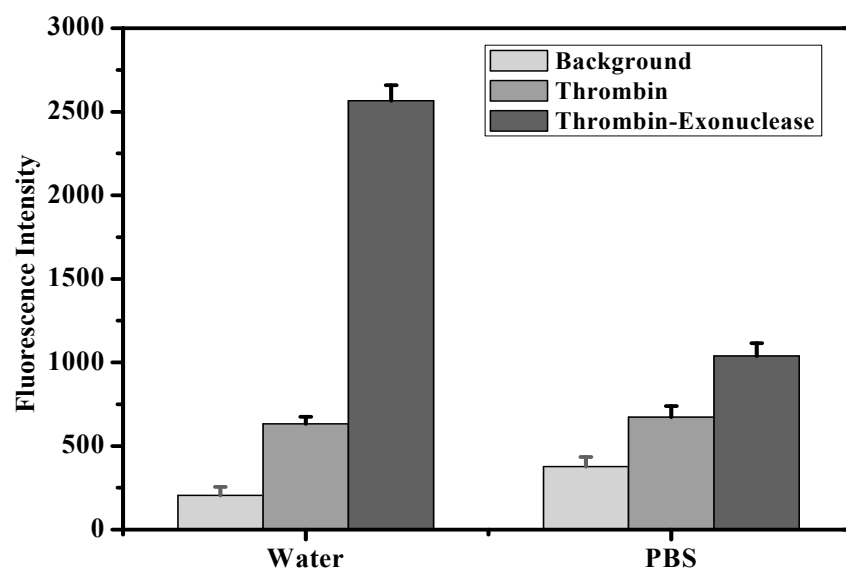

**Figure S6.** The Influence of buffer environment for the detection of thrombin
